# Supplementary material for: Excessive health behaviors in sports: links of orthorexia nervosa and exercise addiction with well-being, exercise activity in sports categories, and gender effects
Source: Frontiers journal article supplement (doi:10.3389/fnut.2024.1494958), 2024-12-03
Supplement: Table_1.pdf [file Table_1.pdf]

Wachten H, Wurst R, Paganini S and Strahler J (2024) Excessive health behaviors in sports: links of orthorexia nervosa and exercise addiction with well-being, exercise activity in sports categories, and gender effects.

Front. Nutr. 11:1494958.

doi: 10.3389/fnut.2024.1494958

### Supplementary Table

Generalized *p*-values of parametric bootstrapping 2x2 ANOVAs with independent variables sport (no sports vs. indicated sports category), gender (women vs. men) and dependent variables Exercise Addiction, Orthorexia nervosa, Healthy Orthorexia and Well-Being.

|              | Endurance       | Resistance and<br>fitness | Health          | Ball and<br>team | Antigravitation | Technical       | Aesthetic   | Rehabilitation  | Martial<br>Arts |
|--------------|-----------------|---------------------------|-----------------|------------------|-----------------|-----------------|-------------|-----------------|-----------------|
| EAI-R        |                 |                           |                 |                  |                 |                 |             |                 |                 |
| Sport        | <b>&lt;.001</b> | <b>&lt;.001</b>           | <b>&lt;.001</b> | <b>&lt;.001</b>  | <b>&lt;.001</b> | <b>&lt;.001</b> | <b>.006</b> | <b>.032</b>     | <b>&lt;.001</b> |
| Gender       | .211            | <b>&lt;.001</b>           | .921            | .079             | .976            | .794            | .889        | .336            | .963            |
| SportxGender | .292            | <b>.031</b>               | .853            | .071             | .906            | .506            | .649        | .219            | .809            |
| TOS OrNe     |                 |                           |                 |                  |                 |                 |             |                 |                 |
| Sport        | .054            | <b>.050</b>               | .810            | .242             | .248            | .471            | .773        | <b>.042</b>     | <b>.031</b>     |
| Gender       | <b>.002</b>     | <b>.003</b>               | <b>.001</b>     | <b>.012</b>      | <b>&lt;.001</b> | <b>.026</b>     | <b>.049</b> | <b>&lt;.001</b> | <b>.018</b>     |
| SportxGender | .361            | .438                      | .593            | .566             | .114            | .223            | .714        | .088            | .119            |
| TOS HeOr     |                 |                           |                 |                  |                 |                 |             |                 |                 |
| Sport        | <b>.001</b>     | <b>&lt;.001</b>           | <b>&lt;.001</b> | <b>.045</b>      | <b>&lt;.001</b> | .160            | .147        | .105            | <b>.005</b>     |
| Gender       | .345            | .371                      | .112            | .327             | .150            | .389            | <b>.044</b> | <b>.025</b>     | .367            |
| SportxGender | .362            | .315                      | <b>.038</b>     | .163             | .737            | .328            | .088        | .058            | .368            |
| WHO-5        |                 |                           |                 |                  |                 |                 |             |                 |                 |
| Sport        | <b>&lt;.001</b> | <b>&lt;.001</b>           | <b>&lt;.001</b> | <b>&lt;.001</b>  | <b>&lt;.001</b> | <b>&lt;.001</b> | <b>.031</b> | .819            | .180            |
| Gender       | <b>&lt;.001</b> | <b>&lt;.001</b>           | .064            | <b>.001</b>      | <b>.015</b>     | <b>.029</b>     | .157        | .081            | <b>.022</b>     |
| SportxGender | .752            | .793                      | .409            | .742             | .879            | .905            | .474        | .672            | .668            |

Note. EAI-R = Exercise Addiction Inventory Revised; TOS HeOr = Healthy Orthorexia subscale of the Teurel Orthorexia Scale; TOS OrNe = Orthorexia nervosa subscale of the Teurel Orthorexia Scale; WHO-5 = WHO-5 Well Being Scale.
